# Supplementary material for: The autistic-like behaviors development during weaning and sexual maturation in VPA-induced autistic-like rats is accompanied by gut microbiota dysbiosis
Source: PeerJ. 2021 May 3;9:e11103. doi: 10.7717/peerj.11103 (PMC8101471; doi:10.7717/peerj.11103)
Supplement: Data S1 [file peerj-09-11103-s002.xlsx]

## Sheet: Sheet1
CON3	CON8	VPA3	VPA8
1.426	0.3666	1.16	0.407346
1.521	0.453077	2.222	0.475471
2.655	0.448827	1.286	0.667169
2.045	0.274502	0.86	0.590351
1.844	0.548686	0.835	0.519039
2.547	0.360838	2.907	0.464292

## Sheet: Sheet2
acetic acid					Fertility rate				Weight				Directional tendency					swim / score
CON4	CON8	VPA4	VPA8		Control	VPA			1w	4w	8w		7d	8d	9d	10d		9d	11d	13d													3	2	3	3
1.426	0.3666	1.16	0.407346		12	12		Control	14.58	35.2	309.5	Control	0	10	8	6	Control	3	4	4													3	3	4	3
1.521	0.453077	2.222	0.475471		11	11			13.96	33.7	300.1		0.5	15	13	3		3	4	4													4	3	3	3	4
2.655	0.448827	1.286	0.667169		10	8			13.38	36	297.5		0.1	20	29	16		3	4	4
2.045	0.274502	0.86	0.590351		12	8			13.12	36.7	301.4		0.5	16	27	4		4	4	4
1.844	0.548686	0.835	0.519039		15	9			13.95	36.5	295.9		0.5	10	6	9		3	4	4
2.547	0.360838	2.907	0.464292		16	10			14.48	33.3	290.5		0	14	6	9		3	3	4
									13	34	310		0	14	6	6		3	4	4
propionic acid									13.91	35.1	288		0	21	8	7		4	4	3
0.409	0.142513	0.49	0.216756						13.05	34.7	290		0	7	10	5		4		4
0.296	0.15355	0.675	0.186661						14.51	34.9	301		0.2	10	7	4				4
0.493	0.204242	0.502	0.244515					VPA	11.15	29.6	284.2	VPA	0	52	40	12	VPA	3	3	3
0.399	0.157725	0.734	0.215619						9.79	30.1	279.5		0	120	47	17		2	4	4
0.167	0.238013	0.408	0.249368						9.03	29.5	265.1		0.5	90	25	17		3	3	3
0.493	0.209978	0.3	0.294505						11.81	32.6	279		0	14	39	9		3	3	4
									5.2	30.9	245.7		0	7	16	22		2	3	4
Butyric acid									7.49	27.9	286.9		0	9	8	27		3	3	4
CON4	CON8	VPA4	VPA8						9.83	31.8	258.1		0	50	27	50		2	3	3
0.287	0.422392	0.174	0.0403962						11.2	33.6	280.2		0.5	17	15	34		3	4	3
0.248	0.320186	0.197	0.401368						7.05	29.2	294.3		0	120	36	36		3	3	3
0.644	0.492328	0.107	0.441047						10.91	31.5	261.6		0	120	8	21				4
0.335	0.446614	0.196	0.450946
0.342	0.462524	0.178	0.362222
0.482			0.208618
					open filed test	4w	8w	Nose touching nevol object/S	4w	8w	Grooming frequency	4w	8w	Fecal grains	4w	8w
valerate					control	14.5239	42.541	control	9.11501	40.3337	control	2	2	control	3	8
CON4	CON8	VPA4	VPA8			25.2416	37.5244		6.42128	16.2267		1	1		1	0
0.00702389	0.0450042	0.00694899	0.00600527			13.4446	38.327		10.317	37.3615		3	1		0	0
0.0115368	0.0541958	0.0459923	0.0676938			31.7523	40.735		6.91139	18.831		2	2		2	2
0.0213956	0.0880548	0.0222725	0.063496			10.8178	21.2705		8.62859	27.0445		1	1		2	2
0.0175589	0.0517316	0.357529	0.0712414			10.7177	42.6703		18.831	30.5503		2	3		2	2
0.00811322	0.0820609	0.382995	0.0736836			7.91303	33.1546		8.91469	21.4712		3	2		2	2
0.020772	0.0983642	0.125294	0.0152196			7.41221	45.4749		31.9057	33.1546		1	1		1	1
						8.22726	52.9756		15.0247	19.2317		2	1		0	0
isobutyric acid						23.4778	29.0964		23.6389	17		1	1
CON4	CON8	VPA4	VPA8		VPA	6.42128	21.2705	VPA	6.22061	18.4612	VPA	5	3	VPA
0.018	0.0358862	0.012	0.00447883			9.716	22.0731		7.02327	11.6191		4	4		3	5
0.011	0.0356823	0.039	0.0465278			19.1315	18.7309		3.21064	23.2771		6	3		5	7
0.026	0.0555699	0.015	0.0405102			0.300495	5.10841		5.01662	17.2572		5	5		2	2
0.029	0.0354672	0.004	0.0415113			22.437	11.0182		13.6452	15.6519			5		3	3
0.015	0.0491118	0.002	0.045083			12.2406	12.6419		8.51403	5.81928		3	4		2	2
0.028	0.0569291	0.024	0.0155818			13.2439	23.8791		4.0066	5.01662		5	5		3	3
						3.21064	2.80931		5.61862	12.9213		4	6		3	3
isovalerate							5.7094		6.42128	9.41551		6	4		2	2
CON4	CON8	VPA4	VPA8			2.40396	3.61197		4.81596	8.81452		4	5
0.01	0.0427782	0.01	0.00556739
0.009	0.03684	0.02	0.0551208
0.015	0.0730978	0.011	0.0476789
0.017	0.0439637	0.005	0.0467435
0.008	0.0513319	0.004	0.0511484
0.018	0.0766506	0.039	0.0132951
