# Supplementary material for: The autistic-like behaviors development during weaning and sexual maturation in VPA-induced autistic-like rats is accompanied by gut microbiota dysbiosis
Source: PeerJ journal article supplement (doi:10.7717/peerj.11103), 2021-05-03

- Body weight monitoring (P 7d, 21d, 56d)
- Incline test (P 7d, 8d, 9d, 10d)
- Swimming coordination (P 7d, 11d, 13d)

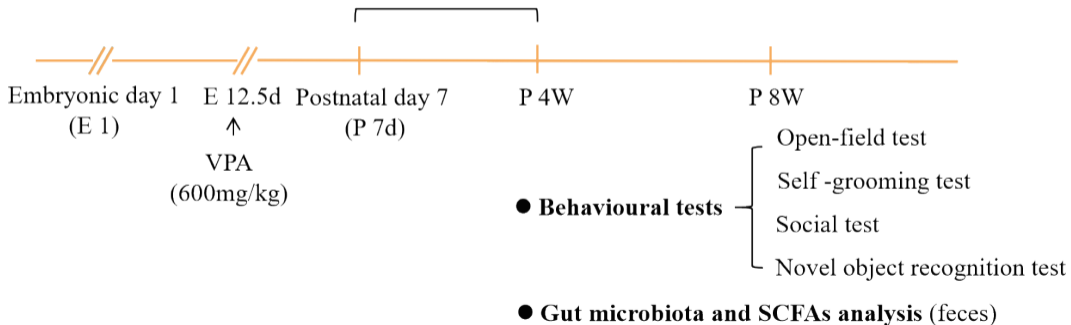

Supplement: Figure_S1.pdf [file Figure_S1.pdf]
