# Supplementary material for: The autistic-like behaviors development during weaning and sexual maturation in VPA-induced autistic-like rats is accompanied by gut microbiota dysbiosis
Source: PeerJ. 2021 May 3;9:e11103. doi: 10.7717/peerj.11103 (PMC8101471; doi:10.7717/peerj.11103)
Supplement: Supplemental Information 1 [file peerj-09-11103-s001.xlsx]

## Sheet: Sheet1
sample-id	absolute-filepath	direction
control1	6_R1.fastq.gz	forward
control1	6_R2.fastq.gz	reverse
control2	7_R1.fastq.gz	forward
control2	7_R2.fastq.gz	reverse
control3	8_R1.fastq.gz	forward
control3	8_R2.fastq.gz	reverse
control4	9_R1.fastq.gz	forward
control4	9_R2.fastq.gz	reverse
control5	10_R1.fastq.gz	forward
control5	10_R2.fastq.gz	reverse
VPA1	21_R1.fastq.gz	forward
VPA1	21_R2.fastq.gz	reverse
VPA2	22_R1.fastq.gz	forward
VPA2	22_R2.fastq.gz	reverse
VPA3	23_R1.fastq.gz	forward
VPA3	23_R2.fastq.gz	reverse
VPA4	24_R1.fastq.gz	forward
VPA4	24_R2.fastq.gz	reverse
VPA5	25_R1.fastq.gz	forward
VPA5	25_R2.fastq.gz	reverse
CCFM10761	41_R1.fastq.gz	forward
CCFM10761	41_R2.fastq.gz	reverse
CCFM10762	42_R1.fastq.gz	forward
CCFM10762	42_R2.fastq.gz	reverse
CCFM10763	43_R1.fastq.gz	forward
CCFM10763	43_R2.fastq.gz	reverse
CCFM10764	44_R1.fastq.gz	forward
CCFM10764	44_R2.fastq.gz	reverse
CCFM10765	45_R1.fastq.gz	forward
CCFM10765	45_R2.fastq.gz	reverse
La281	46_R1.fastq.gz	forward
La281	46_R2.fastq.gz	reverse
La282	47_R1.fastq.gz	forward
La282	47_R2.fastq.gz	reverse
La283	48_R1.fastq.gz	forward
La283	48_R2.fastq.gz	reverse
La284	49_R1.fastq.gz	forward
La284	49_R2.fastq.gz	reverse
La285	50_R1.fastq.gz	forward
La285	50_R2.fastq.gz	reverse
JCM11321	50_R1.fastq.gz	forward
JCM11321	50_R2.fastq.gz	reverse
JCM11322	51_R1.fastq.gz	forward
JCM11322	51_R2.fastq.gz	reverse
JCM11323	52_R1.fastq.gz	forward
JCM11323	52_R2.fastq.gz	reverse
JCM11324	53_R1.fastq.gz	forward
JCM11324	53_R2.fastq.gz	reverse
JCM11325	54_R1.fastq.gz	forward
JCM11325	54_R2.fastq.gz	reverse
JCM11326	55_R1.fastq.gz	forward
JCM11326	55_R2.fastq.gz	reverse
MED1	36_R1.fastq.gz	forward
MED1	36_R2.fastq.gz	reverse
MED2	37_R1.fastq.gz	forward
MED2	37_R2.fastq.gz	reverse
MED3	38_R1.fastq.gz	forward
MED3	38_R2.fastq.gz	reverse
MED4	39_R1.fastq.gz	forward
MED4	39_R2.fastq.gz	reverse
MED5	40_R1.fastq.gz	forward
MED5	40_R2.fastq.gz	reverse
