# Supplementary material for: The autistic-like behaviors development during weaning and sexual maturation in VPA-induced autistic-like rats is accompanied by gut microbiota dysbiosis
Source: PeerJ. 2021 May 3;9:e11103. doi: 10.7717/peerj.11103 (PMC8101471; doi:10.7717/peerj.11103)
Supplement: Supplemental Information 3 [file peerj-09-11103-s003.xlsx]

## Sheet: P-values for Figure 7
	Prevotellaceae.UCG.001	Rikenellaceae.RC9.gut.group	Parabacteroides	Helicobacter	GCA.900066575	Lachnospiraceae.NK4A136.group	X.Eubacterium..ruminantium.group	Fournierella	Harryflintia	Intestinimonas	Negativibacillus	Ruminiclostridium	Ruminococcaceae.UCG.005	Ruminococcaceae.UCG.014	X.Eubacterium..coprostanoligenes.group	Allobaculum	Veillonella	Epithelial.cell.signaling.in.Helicobacter.pylori.infection	Lipopolysaccharide.biosynthesis	Lipopolysaccharide.biosynthesis.proteins	Rikenellaceae.RC9.gut.group.1	Grooming.frequency	Exploration.behaviour	Social.index	Novel.object.recognition.behaviour	Anxiety.like.behaviour	Acetic.acid	Propionicacid	Butyrate	Valericacid	Isobutyricacid	Isovalericacid
Prevotellaceae.UCG.001	0	0.544093	0.544093	0.871743	0.294584	0.787172	0.863763	0.227784	0.116807	0.867934	0.000309086	0.957155	0.622787	0.110787	0.396501	0.826848	0.512225	0.622787	0.208	0.208	0.544093	0.600355	0.396501	0.544093	0.704	0.319537	0.396501	0.622787	0.396501	0.0188455	0.871743	0.265703
Rikenellaceae.RC9.gut.group	0.544093	0	0	0.622787	0.686031	0.00480466	0.0205987	0.320633	0.279826	0.955876	0.424663	0.396501	0.957155	0.871743	0.622787	0.124789	0.748868	0.328723	0.622787	0.622787	0	0.438739	0.622787	0.396501	0.957155	0.953724	0.208	0.957155	0.265703	0.704	0.0723965	0.787172
Parabacteroides	0.544093	0	0	0.622787	0.686031	0.00480466	0.0205987	0.320633	0.279826	0.955876	0.424663	0.396501	0.957155	0.871743	0.622787	0.124789	0.748868	0.328723	0.622787	0.622787	0	0.438739	0.622787	0.396501	0.957155	0.953724	0.208	0.957155	0.265703	0.704	0.0723965	0.787172
Helicobacter	0.871743	0.622787	0.622787	0	0.600355	0.787172	0.438739	0.0835233	0.612055	0.780909	0.658374	0.396501	0.787172	0.544093	0.957155	0.699798	0.557699	0.156175	0.328723	0.328723	0.622787	0.686031	0.156175	0.110787	0.0415627	0.054723	0.468478	0.787172	0.208	0.871743	0.787172	0.871743
GCA.900066575	0.294584	0.686031	0.686031	0.600355	0	0.954476	0.760162	0.861785	0.721913	0.156663	0.356269	0.294584	0.0205987	0.00509754	0.954476	0.770811	0.107767	0.122839	0.00509754	0.00509754	0.686031	0.259877	0.122839	0.5177	0.230732	0.950831	0.0458371	0.0205987	0.438739	0.863763	0.600355	0.122839
Lachnospiraceae.NK4A136.group	0.787172	0.00480466	0.00480466	0.787172	0.954476	0	0.0801412	0.499253	0.279826	0.695412	0.658374	0.544093	0.622787	0.787172	0.468478	0.0498576	0.898736	0.208	0.871743	0.871743	0.00480466	0.230732	0.787172	0.328723	0.871743	0.725428	0.328723	0.622787	0.208	0.787172	0.0415627	0.396501
X.Eubacterium..ruminantium.group	0.863763	0.0205987	0.0205987	0.438739	0.760162	0.0801412	0	0.286336	0.589059	0.504462	0.725938	0.230732	0.686031	0.954476	0.686031	0.511215	0.484359	0.294584	0.863763	0.863763	0.0205987	0.855292	0.686031	0.686031	0.954476	0.950831	0.438739	0.686031	0.686031	0.954476	0.0801412	0.954476
Fournierella	0.227784	0.320633	0.320633	0.0835233	0.861785	0.499253	0.286336	1.85e-32	0.428188	0.734187	0.140075	0.826848	0.86988	1	0.913132	0.846134	0.922894	0.288343	0.784108	0.784108	0.320633	0.356269	0.784108	0.741734	0.424663	0.10651	0.826848	0.86988	0.826848	0.173071	0.320633	0.699798
Harryflintia	0.116807	0.279826	0.279826	0.612055	0.721913	0.279826	0.589059	0.428188	0	0.664961	0.143965	0.49237	0.867934	0.49237	0.49237	0.428188	0.545372	1	0.380939	0.380939	0.279826	0.244957	0.191094	0.0590276	0.380939	0.857414	0.380939	0.867934	0.0590276	0.0590276	0.191094	0.737931
Intestinimonas	0.867934	0.955876	0.955876	0.780909	0.156663	0.695412	0.504462	0.734187	0.664961	0	0.799697	0.0956108	0.0112351	0.345986	0.116807	0.565493	0.0383317	0.345986	0.345986	0.345986	0.955876	0.0223109	0.279826	0.911828	0.279826	0.626833	0.454207	0.0112351	0.867934	0.417038	0.780909	0.139837
Negativibacillus	0.000309086	0.424663	0.424663	0.658374	0.356269	0.658374	0.725938	0.140075	0.143965	0.799697	1.85e-32	0.956529	0.699798	0.173071	0.354164	0.759469	0.62264	0.826848	0.288343	0.288343	0.424663	0.511215	0.537901	0.658374	0.913132	0.228296	0.424663	0.699798	0.461483	0.0243769	0.784108	0.354164
Ruminiclostridium	0.957155	0.396501	0.396501	0.396501	0.294584	0.544093	0.230732	0.826848	0.49237	0.0956108	0.956529	0	0.208	0.468478	0.328723	0.784108	0.0341094	0.622787	0.265703	0.265703	0.396501	0.438739	0.0415627	0.156175	0.0723965	0.191744	0.208	0.208	0.328723	0.787172	0.396501	0.396501
Ruminococcaceae.UCG.005	0.622787	0.957155	0.957155	0.787172	0.0205987	0.622787	0.686031	0.86988	0.867934	0.0112351	0.699798	0.208	0	0.0723965	0.396501	0.658374	0.0341094	0.156175	0.110787	0.110787	0.957155	0.0458371	0.208	0.871743	0.265703	0.953724	0.265703	0	0.957155	0.787172	0.544093	0.0415627
Ruminococcaceae.UCG.014	0.110787	0.871743	0.871743	0.544093	0.00509754	0.787172	0.954476	1	0.49237	0.345986	0.173071	0.468478	0.0723965	0	0.787172	0.913132	0.140357	0.0723965	0.00480466	0.00480466	0.871743	0.438739	0.110787	0.468478	0.208	0.861524	0.110787	0.0723965	0.396501	0.468478	0.544093	0.0723965
X.Eubacterium..coprostanoligenes.group	0.396501	0.622787	0.622787	0.957155	0.954476	0.468478	0.686031	0.913132	0.49237	0.116807	0.354164	0.328723	0.396501	0.787172	0	0.124789	0.267778	0.871743	0.704	0.704	0.622787	0.17326	0.787172	0.704	0.622787	0.681004	0.544093	0.396501	0.328723	0.396501	0.957155	0.396501
Allobaculum	0.826848	0.124789	0.124789	0.699798	0.770811	0.0498576	0.511215	0.846134	0.428188	0.565493	0.759469	0.784108	0.658374	0.913132	0.124789	1.85e-32	0.671119	0.658374	0.537901	0.537901	0.124789	0.356269	0.741734	0.257369	0.956529	0.524616	0.14809	0.658374	0.0835233	0.956529	0.424663	0.288343
Veillonella	0.512225	0.748868	0.748868	0.557699	0.107767	0.898736	0.484359	0.922894	0.545372	0.0383317	0.62264	0.0341094	0.0341094	0.140357	0.267778	0.671119	7.4e-32	0.267778	0.140357	0.140357	0.748868	0.232819	0.0341094	0.383221	0.0687269	0.650666	0.304559	0.0341094	0.604217	0.848394	0.848394	0.0341094
Epithelial.cell.signaling.in.Helicobacter.pylori.infection	0.622787	0.328723	0.328723	0.156175	0.122839	0.208	0.294584	0.288343	1	0.345986	0.826848	0.622787	0.156175	0.0723965	0.871743	0.658374	0.267778	0	0.110787	0.110787	0.328723	0.17326	0.208	0.622787	0.110787	0.681004	0.468478	0.156175	0.704	0.957155	0.156175	0.156175
Lipopolysaccharide.biosynthesis	0.208	0.622787	0.622787	0.328723	0.00509754	0.871743	0.863763	0.784108	0.380939	0.345986	0.288343	0.265703	0.110787	0.00480466	0.704	0.537901	0.140357	0.110787	0	0	0.622787	0.5177	0.0415627	0.208	0.110787	0.725428	0.0188455	0.110787	0.156175	0.622787	0.787172	0.208
Lipopolysaccharide.biosynthesis.proteins	0.208	0.622787	0.622787	0.328723	0.00509754	0.871743	0.863763	0.784108	0.380939	0.345986	0.288343	0.265703	0.110787	0.00480466	0.704	0.537901	0.140357	0.110787	0	0	0.622787	0.5177	0.0415627	0.208	0.110787	0.725428	0.0188455	0.110787	0.156175	0.622787	0.787172	0.208
Rikenellaceae.RC9.gut.group.1	0.544093	0	0	0.622787	0.686031	0.00480466	0.0205987	0.320633	0.279826	0.955876	0.424663	0.396501	0.957155	0.871743	0.622787	0.124789	0.748868	0.328723	0.622787	0.622787	0	0.438739	0.622787	0.396501	0.957155	0.953724	0.208	0.957155	0.265703	0.704	0.0723965	0.787172
Grooming.frequency	0.600355	0.438739	0.438739	0.686031	0.259877	0.230732	0.855292	0.356269	0.244957	0.0223109	0.511215	0.438739	0.0458371	0.438739	0.17326	0.356269	0.232819	0.17326	0.5177	0.5177	0.438739	0	0.600355	0.686031	0.438739	0.708686	0.774058	0.0458371	0.5177	0.230732	0.230732	0.230732
Exploration.behaviour	0.396501	0.622787	0.622787	0.156175	0.122839	0.787172	0.686031	0.784108	0.191094	0.279826	0.537901	0.0415627	0.208	0.110787	0.787172	0.741734	0.0341094	0.208	0.0415627	0.0415627	0.622787	0.600355	0	0.0415627	0.00480466	0.319537	0.110787	0.208	0.110787	0.622787	0.704	0.208
Social.index	0.544093	0.396501	0.396501	0.110787	0.5177	0.328723	0.686031	0.741734	0.0590276	0.911828	0.658374	0.156175	0.871743	0.468478	0.704	0.257369	0.383221	0.622787	0.208	0.208	0.396501	0.686031	0.0415627	0	0.0723965	0.163984	0.156175	0.871743	0.00480466	0.544093	0.328723	0.871743
Novel.object.recognition.behaviour	0.704	0.957155	0.957155	0.0415627	0.230732	0.871743	0.954476	0.424663	0.380939	0.279826	0.913132	0.0723965	0.265703	0.208	0.622787	0.956529	0.0687269	0.110787	0.110787	0.110787	0.957155	0.438739	0.00480466	0.0723965	0	0.163984	0.265703	0.265703	0.208	0.871743	0.957155	0.265703
Anxiety.like.behaviour	0.319537	0.953724	0.953724	0.054723	0.950831	0.725428	0.950831	0.10651	0.857414	0.626833	0.228296	0.191744	0.953724	0.861524	0.681004	0.524616	0.650666	0.681004	0.725428	0.725428	0.953724	0.708686	0.319537	0.163984	0.163984	0	0.551786	0.953724	0.319537	0.355232	0.681004	0.681004
Acetic.acid	0.396501	0.208	0.208	0.468478	0.0458371	0.328723	0.438739	0.826848	0.380939	0.454207	0.424663	0.208	0.265703	0.110787	0.544093	0.14809	0.304559	0.468478	0.0188455	0.0188455	0.208	0.774058	0.110787	0.156175	0.265703	0.551786	0	0.265703	0.0723965	0.871743	0.787172	0.622787
Propionicacid	0.622787	0.957155	0.957155	0.787172	0.0205987	0.622787	0.686031	0.86988	0.867934	0.0112351	0.699798	0.208	0	0.0723965	0.396501	0.658374	0.0341094	0.156175	0.110787	0.110787	0.957155	0.0458371	0.208	0.871743	0.265703	0.953724	0.265703	0	0.957155	0.787172	0.544093	0.0415627
Butyrate	0.396501	0.265703	0.265703	0.208	0.438739	0.208	0.686031	0.826848	0.0590276	0.867934	0.461483	0.328723	0.957155	0.396501	0.328723	0.0835233	0.604217	0.704	0.156175	0.156175	0.265703	0.5177	0.110787	0.00480466	0.208	0.319537	0.0723965	0.957155	0	0.468478	0.396501	0.957155
Valericacid	0.0188455	0.704	0.704	0.871743	0.863763	0.787172	0.954476	0.173071	0.0590276	0.417038	0.0243769	0.787172	0.787172	0.468478	0.396501	0.956529	0.848394	0.957155	0.622787	0.622787	0.704	0.230732	0.622787	0.544093	0.871743	0.355232	0.871743	0.787172	0.468478	0	0.622787	0.544093
Isobutyricacid	0.871743	0.0723965	0.0723965	0.787172	0.600355	0.0415627	0.0801412	0.320633	0.191094	0.780909	0.784108	0.396501	0.544093	0.544093	0.957155	0.424663	0.848394	0.156175	0.787172	0.787172	0.0723965	0.230732	0.704	0.328723	0.957155	0.681004	0.787172	0.544093	0.396501	0.622787	0	0.622787
Isovalericacid	0.265703	0.787172	0.787172	0.871743	0.122839	0.396501	0.954476	0.699798	0.737931	0.139837	0.354164	0.396501	0.0415627	0.0723965	0.396501	0.288343	0.0341094	0.156175	0.208	0.208	0.787172	0.230732	0.208	0.871743	0.265703	0.681004	0.622787	0.0415627	0.957155	0.544093	0.622787	0
