# Supplementary material for: The autistic-like behaviors development during weaning and sexual maturation in VPA-induced autistic-like rats is accompanied by gut microbiota dysbiosis
Source: PeerJ. 2021 May 3;9:e11103. doi: 10.7717/peerj.11103 (PMC8101471; doi:10.7717/peerj.11103)
Supplement: Supplemental Information 4 [file peerj-09-11103-s004.xlsx]

## Sheet: P-values for Figure 8
	g_Odoribacter	g_Prevotella.9	g_Prevotellaceae.Ga6A1.group	g_Alistipes	g_Gemella	g_Roseburia	g_.Eubacterium..ruminantium.group	g_.Eubacterium..coprostanoligenes.group	g_Desulfovibrio	g_Helicobacter	g_Ruminococcaceae.NK4A214.group	Carotenoid.biosynthesis	Epithelial.cell.signaling.in.Helicobacter.pylori.infection	Inositol.phosphate.metabolism	Lipopolysaccharide.biosynthesis	Lipopolysaccharide.biosynthesis.proteins	Nucleotide.metabolism	Phenylalanine.metabolism	Phenylalanine..tyrosine.and.tryptophan.biosynthesis	Phosphotransferase.system..PTS.	Tryptophan.metabolism	Valine..leucine.and.isoleucine.biosynthesis	Valine..leucine.and.isoleucine.degradation	Grooming.frequency	Exploration.behaviour	Social.index	Novel.object.recognition.behaviour	Anxiety.like.behaviour	Acetic.acid	Propionicacid	Butyrate	Valericacid	Isobutyricacid	Isovalericacid
g_Odoribacter	0	0.0198204	0.164625	0.320875	0.476082	0.463631	0.0306986	0.0198204	0.755917	0.164625	0.53145	0.867934	0.0306986	0.0956108	0.279826	0.0956108	0.53145	0.0306986	0.00124859	0.867934	0.0956108	0.00124859	0.0306986	0.435437	0.380939	0.0956108	0.57137	0.112382	0.780909	0.653428	0.57137	0.955876	0.780909	0.867934
g_Prevotella.9	0.0198204	0	0.468478	0.577352	0.94931	0.686031	0.156175	0.00480466	1	0.208	0.957155	0.871743	0.156175	0.396501	0.208	0.110787	0.265703	0.156175	0.0415627	0.871743	0.468478	0.0415627	0.265703	0.815776	0.396501	0.110787	0.468478	0.312257	0.787172	0.871743	0.787172	0.957155	0.957155	0.622787
g_Prevotellaceae.Ga6A1.group	0.164625	0.468478	0	0.173071	0.0341094	0.122839	0.0415627	0.622787	0.577352	0.396501	0.871743	0.265703	0.0415627	0.0723965	0.468478	0.265703	0.396501	0.0415627	0.0723965	0.265703	0.156175	0.0723965	0.208	0.319537	0.544093	0.265703	0.957155	0.0306986	0.957155	0.622787	0.787172	0.957155	0.468478	0.787172
g_Alistipes	0.320875	0.577352	0.173071	1.85e-32	0.0290154	0.00300995	0.577352	0.461483	0.591789	0.288343	0.826848	0.699798	0.577352	0.699798	0.577352	1	0.913132	0.577352	0.354164	0.699798	0.577352	0.354164	0.354164	0.976519	0.913132	1	0.424663	0.00812374	0.354164	0.499253	0.499253	0.19966	0.741734	0.826848
g_Gemella	0.476082	0.94931	0.0341094	0.0290154	7.4e-32	0.0150677	0.383221	0.94931	0.974278	0.557699	0.94931	0.604217	0.383221	0.383221	0.798399	0.848394	0.383221	0.383221	0.383221	0.604217	0.383221	0.383221	0.383221	0.650666	0.46791	0.848394	0.898736	0.0241101	0.512225	0.848394	0.557699	0.557699	0.557699	0.748868
g_Roseburia	0.463631	0.686031	0.122839	0.00300995	0.0150677	0	0.600355	0.686031	0.552581	0.438739	0.5177	0.954476	0.600355	0.774058	0.686031	0.954476	0.774058	0.600355	0.438739	0.954476	0.774058	0.438739	0.600355	0.901767	0.5177	0.954476	0.600355	0.0126532	0.294584	0.438739	0.294584	0.294584	0.438739	0.954476
g_.Eubacterium..ruminantium.group	0.0306986	0.156175	0.0415627	0.577352	0.383221	0.600355	0	0.265703	0.320633	0.328723	0.468478	0.265703	0	0.00480466	0.110787	0.0415627	0.787172	0	0.00480466	0.265703	0.0415627	0.00480466	0.0723965	0.163984	0.871743	0.0415627	0.957155	0.191094	0.468478	0.265703	0.622787	0.544093	0.871743	0.871743
g_.Eubacterium..coprostanoligenes.group	0.0198204	0.00480466	0.622787	0.461483	0.94931	0.686031	0.265703	0	0.913132	0.156175	0.704	0.544093	0.265703	0.468478	0.468478	0.265703	0.110787	0.265703	0.0723965	0.544093	0.396501	0.0723965	0.156175	0.815776	0.156175	0.265703	0.328723	0.312257	0.871743	0.957155	0.622787	0.787172	0.622787	0.544093
g_Desulfovibrio	0.755917	1	0.577352	0.591789	0.974278	0.552581	0.320633	0.913132	1.85e-32	0.424663	0.14809	0.499253	0.320633	0.19966	0.617534	0.784108	0.699798	0.320633	0.537901	0.499253	0.257369	0.537901	0.461483	0.00540848	0.956529	0.784108	0.699798	0.932873	0.00766584	0.000309086	0.826848	0.784108	0.699798	0.537901
g_Helicobacter	0.164625	0.208	0.396501	0.288343	0.557699	0.438739	0.328723	0.156175	0.424663	0	0.544093	0.468478	0.328723	0.468478	0.957155	0.871743	0.328723	0.328723	0.156175	0.468478	0.396501	0.156175	0.208	0.252466	0.622787	0.871743	0.0188455	0.191094	0.396501	0.468478	0.622787	0.208	0.622787	0.0723965
g_Ruminococcaceae.NK4A214.group	0.53145	0.957155	0.871743	0.826848	0.94931	0.5177	0.468478	0.704	0.14809	0.544093	0	0.957155	0.468478	0.208	0.957155	0.871743	0.787172	0.468478	0.544093	0.957155	0.0723965	0.544093	0.110787	0.072343	0.208	0.871743	0.787172	0.955876	0.208	0.110787	0.156175	0.871743	0.265703	0.871743
Carotenoid.biosynthesis	0.867934	0.871743	0.265703	0.699798	0.604217	0.954476	0.265703	0.544093	0.499253	0.468478	0.957155	0	0.265703	0.208	0.156175	0.208	0.0415627	0.265703	0.622787	0	0.468478	0.622787	0.871743	0.551786	0.328723	0.208	0.110787	0.911828	0.787172	0.468478	0.704	0.0723965	0.704	0.156175
Epithelial.cell.signaling.in.Helicobacter.pylori.infection	0.0306986	0.156175	0.0415627	0.577352	0.383221	0.600355	0	0.265703	0.320633	0.328723	0.468478	0.265703	0	0.00480466	0.110787	0.0415627	0.787172	0	0.00480466	0.265703	0.0415627	0.00480466	0.0723965	0.163984	0.871743	0.0415627	0.957155	0.191094	0.468478	0.265703	0.622787	0.544093	0.871743	0.871743
Inositol.phosphate.metabolism	0.0956108	0.396501	0.0723965	0.699798	0.383221	0.774058	0.00480466	0.468478	0.19966	0.468478	0.208	0.208	0.00480466	0	0.208	0.110787	0.622787	0.00480466	0.0415627	0.208	0.00480466	0.0415627	0.0415627	0.072343	0.787172	0.110787	0.871743	0.312257	0.396501	0.156175	0.396501	0.468478	0.871743	0.704
Lipopolysaccharide.biosynthesis	0.279826	0.208	0.468478	0.577352	0.798399	0.686031	0.110787	0.468478	0.617534	0.957155	0.957155	0.156175	0.110787	0.208	0	0.00480466	0.787172	0.110787	0.208	0.156175	0.468478	0.208	0.622787	0.681004	0.957155	0.00480466	0.468478	0.911828	0.544093	0.468478	0.468478	0.0723965	0.957155	0.544093
Lipopolysaccharide.biosynthesis.proteins	0.0956108	0.110787	0.265703	1	0.848394	0.954476	0.0415627	0.265703	0.784108	0.871743	0.871743	0.208	0.0415627	0.110787	0.00480466	0	0.871743	0.0415627	0.0723965	0.208	0.265703	0.0723965	0.328723	0.681004	0.787172	0	0.544093	0.53145	0.787172	0.622787	0.396501	0.156175	0.871743	0.468478
Nucleotide.metabolism	0.53145	0.265703	0.396501	0.913132	0.383221	0.774058	0.787172	0.110787	0.699798	0.328723	0.787172	0.0415627	0.787172	0.622787	0.787172	0.871743	0	0.787172	0.787172	0.0415627	0.871743	0.787172	0.704	0.770382	0.0723965	0.871743	0.156175	0.955876	0.871743	0.787172	0.787172	0.396501	0.468478	0.208
Phenylalanine.metabolism	0.0306986	0.156175	0.0415627	0.577352	0.383221	0.600355	0	0.265703	0.320633	0.328723	0.468478	0.265703	0	0.00480466	0.110787	0.0415627	0.787172	0	0.00480466	0.265703	0.0415627	0.00480466	0.0723965	0.163984	0.871743	0.0415627	0.957155	0.191094	0.468478	0.265703	0.622787	0.544093	0.871743	0.871743
Phenylalanine..tyrosine.and.tryptophan.biosynthesis	0.00124859	0.0415627	0.0723965	0.354164	0.383221	0.438739	0.00480466	0.0723965	0.537901	0.156175	0.544093	0.622787	0.00480466	0.0415627	0.208	0.0723965	0.787172	0.00480466	0	0.622787	0.0723965	0	0.0415627	0.285252	0.622787	0.0723965	0.622787	0.0956108	0.622787	0.468478	0.704	0.871743	0.957155	0.871743
Phosphotransferase.system..PTS.	0.867934	0.871743	0.265703	0.699798	0.604217	0.954476	0.265703	0.544093	0.499253	0.468478	0.957155	0	0.265703	0.208	0.156175	0.208	0.0415627	0.265703	0.622787	0	0.468478	0.622787	0.871743	0.551786	0.328723	0.208	0.110787	0.911828	0.787172	0.468478	0.704	0.0723965	0.704	0.156175
Tryptophan.metabolism	0.0956108	0.468478	0.156175	0.577352	0.383221	0.774058	0.0415627	0.396501	0.257369	0.396501	0.0723965	0.468478	0.0415627	0.00480466	0.468478	0.265703	0.871743	0.0415627	0.0723965	0.468478	0	0.0723965	0.00480466	0.072343	0.468478	0.265703	0.957155	0.312257	0.468478	0.208	0.265703	0.704	0.544093	0.787172
Valine..leucine.and.isoleucine.biosynthesis	0.00124859	0.0415627	0.0723965	0.354164	0.383221	0.438739	0.00480466	0.0723965	0.537901	0.156175	0.544093	0.622787	0.00480466	0.0415627	0.208	0.0723965	0.787172	0.00480466	0	0.622787	0.0723965	0	0.0415627	0.285252	0.622787	0.0723965	0.622787	0.0956108	0.622787	0.468478	0.704	0.871743	0.957155	0.871743
Valine..leucine.and.isoleucine.degradation	0.0306986	0.265703	0.208	0.354164	0.383221	0.600355	0.0723965	0.156175	0.461483	0.208	0.110787	0.871743	0.0723965	0.0415627	0.622787	0.328723	0.704	0.0723965	0.0415627	0.871743	0.00480466	0.0415627	0	0.163984	0.265703	0.328723	0.622787	0.191094	0.622787	0.396501	0.328723	0.957155	0.468478	0.957155
Grooming.frequency	0.435437	0.815776	0.319537	0.976519	0.650666	0.901767	0.163984	0.815776	0.00540848	0.252466	0.072343	0.551786	0.163984	0.072343	0.681004	0.681004	0.770382	0.163984	0.285252	0.551786	0.072343	0.285252	0.163984	0	0.861524	0.681004	0.594094	0.649223	0.054723	0.00804989	0.725428	0.953724	0.861524	0.594094
Exploration.behaviour	0.380939	0.396501	0.544093	0.913132	0.46791	0.5177	0.871743	0.156175	0.956529	0.622787	0.208	0.328723	0.871743	0.787172	0.957155	0.787172	0.0723965	0.871743	0.622787	0.328723	0.468478	0.622787	0.265703	0.861524	0	0.787172	0.622787	0.867934	0.787172	0.871743	0.110787	0.957155	0.0415627	0.787172
Social.index	0.0956108	0.110787	0.265703	1	0.848394	0.954476	0.0415627	0.265703	0.784108	0.871743	0.871743	0.208	0.0415627	0.110787	0.00480466	0	0.871743	0.0415627	0.0723965	0.208	0.265703	0.0723965	0.328723	0.681004	0.787172	0	0.544093	0.53145	0.787172	0.622787	0.396501	0.156175	0.871743	0.468478
Novel.object.recognition.behaviour	0.57137	0.468478	0.957155	0.424663	0.898736	0.600355	0.957155	0.328723	0.699798	0.0188455	0.787172	0.110787	0.957155	0.871743	0.468478	0.544093	0.156175	0.957155	0.622787	0.110787	0.957155	0.622787	0.622787	0.594094	0.622787	0.544093	0	0.49237	0.544093	0.787172	0.396501	0.0415627	0.622787	0.00480466
Anxiety.like.behaviour	0.112382	0.312257	0.0306986	0.00812374	0.0241101	0.0126532	0.191094	0.312257	0.932873	0.191094	0.955876	0.911828	0.191094	0.312257	0.911828	0.53145	0.955876	0.191094	0.0956108	0.911828	0.312257	0.0956108	0.191094	0.649223	0.867934	0.53145	0.49237	0	0.653428	0.867934	0.612055	0.454207	0.612055	0.867934
Acetic.acid	0.780909	0.787172	0.957155	0.354164	0.512225	0.294584	0.468478	0.871743	0.00766584	0.396501	0.208	0.787172	0.468478	0.396501	0.544093	0.787172	0.871743	0.468478	0.622787	0.787172	0.468478	0.622787	0.622787	0.054723	0.787172	0.787172	0.544093	0.653428	0	0.00480466	0.787172	0.787172	0.787172	0.328723
Propionicacid	0.653428	0.871743	0.622787	0.499253	0.848394	0.438739	0.265703	0.957155	0.000309086	0.468478	0.110787	0.468478	0.265703	0.156175	0.468478	0.622787	0.787172	0.265703	0.468478	0.468478	0.208	0.468478	0.396501	0.00804989	0.871743	0.622787	0.787172	0.867934	0.00480466	0	0.622787	0.622787	0.871743	0.622787
Butyrate	0.57137	0.787172	0.787172	0.499253	0.557699	0.294584	0.622787	0.622787	0.826848	0.622787	0.156175	0.704	0.622787	0.396501	0.468478	0.396501	0.787172	0.622787	0.704	0.704	0.265703	0.704	0.328723	0.725428	0.110787	0.396501	0.396501	0.612055	0.787172	0.622787	0	0.208	0.0188455	0.328723
Valericacid	0.955876	0.957155	0.957155	0.19966	0.557699	0.294584	0.544093	0.787172	0.784108	0.208	0.871743	0.0723965	0.544093	0.468478	0.0723965	0.156175	0.396501	0.544093	0.871743	0.0723965	0.704	0.871743	0.957155	0.953724	0.957155	0.156175	0.0415627	0.454207	0.787172	0.622787	0.208	0	0.622787	0.110787
Isobutyricacid	0.780909	0.957155	0.468478	0.741734	0.557699	0.438739	0.871743	0.622787	0.699798	0.622787	0.265703	0.704	0.871743	0.871743	0.957155	0.871743	0.468478	0.871743	0.957155	0.704	0.544093	0.957155	0.468478	0.861524	0.0415627	0.871743	0.622787	0.612055	0.787172	0.871743	0.0188455	0.622787	0	0.468478
Isovalericacid	0.867934	0.622787	0.787172	0.826848	0.748868	0.954476	0.871743	0.544093	0.537901	0.0723965	0.871743	0.156175	0.871743	0.704	0.544093	0.468478	0.208	0.871743	0.871743	0.156175	0.787172	0.871743	0.957155	0.594094	0.787172	0.468478	0.00480466	0.867934	0.328723	0.622787	0.328723	0.110787	0.468478	0
